# Supplementary material for: WRN regulates pathway choice between classical and alternative non-homologous end joining
Source: PubMed Central journal article supplement (PMC5150655; doi:10.1038/ncomms13785), 2016-12-06
Supplement: ncomms13785-s1.pdf [file ncomms13785-s1.pdf]

A

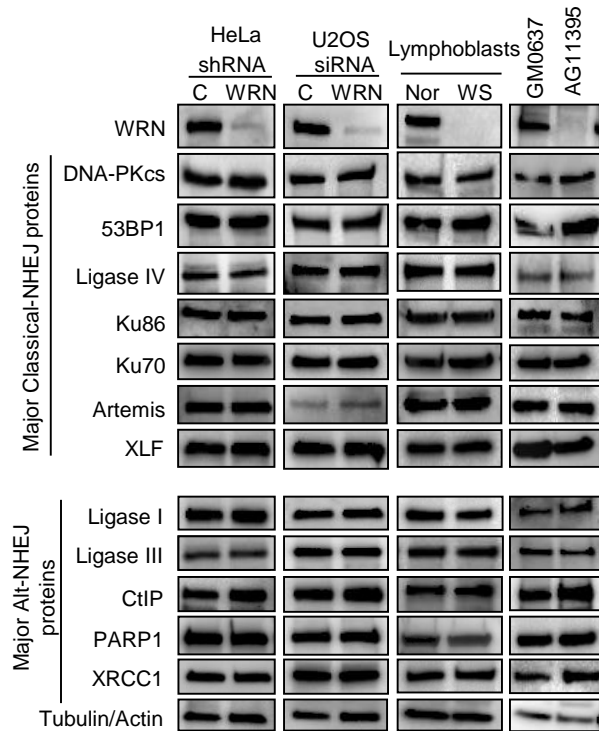

B

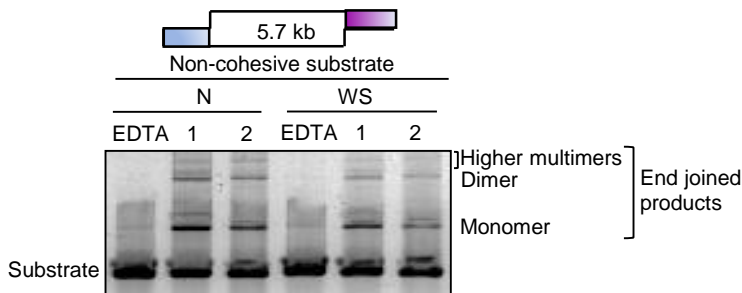

Supplementary figure 1. (A) Expression of DNA repair proteins in WRN deficient cells. Extracts from shRNA/siRNA-treated HeLa and U2OS cells, lymphoblasts (normal [N]; SRY110010, WS; SRY110011) and fibroblasts (normal; GM0637, WS; AG11395) were immunoblotted for indicated DNA repair proteins. (B) WS cells show NHEJ deficiency *in vitro*. Agarose gel showing products from NHEJ reaction with 5.7-kb non-cohesive DNA substrate and cell extracts prepared from normal (N) and WS lymphoblasts.

A

pEGFP-Pem1-Ad2

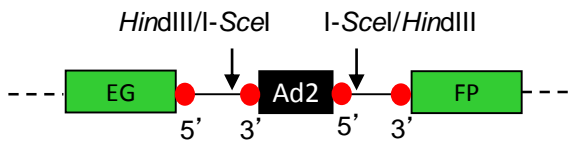

End-joining substrates

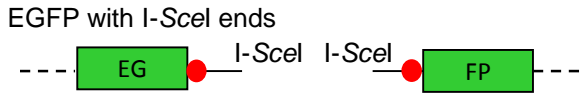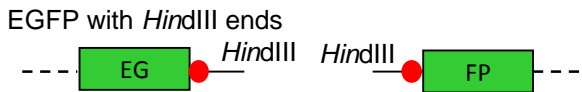

B

EJ2

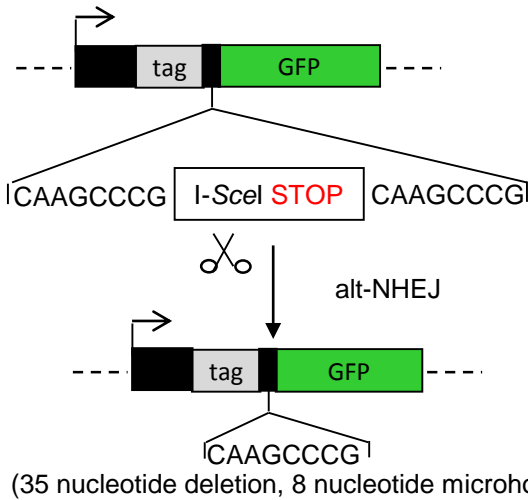

C

EJ5-GFP

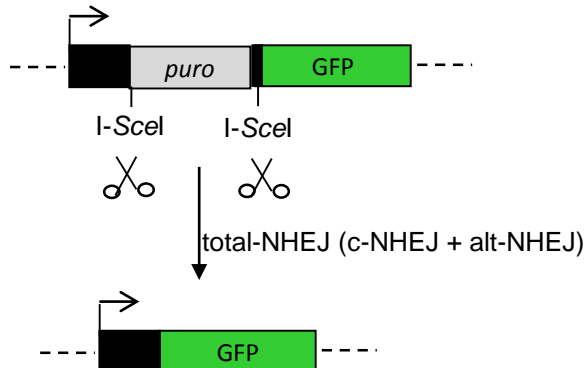

Supplementary figure 2.

Linear diagrams of NHEJ

reporter cassettes. (A)

Reporter cassette of pEGFP-

Pem1-Ad2 plasmid. EGFP

gene in the plasmid is

interrupted by a stuffer

sequence containing Pem1

and Ad2 intron. Endonuclease

sites are marked. Splice sites

are labeled (red circles)

relative to the intron and

endonuclease sites.

Restriction digestion with *I-*

*sceI* or *HindIII* regenerates

reporter cassettes with non-

cohesive and cohesive ends,

respectively. (B) Diagram

showing GFP reporter

cassette in EJ2 cells to

measure alt-NHEJ. (C)

Diagram showing GFP

reporter cassette in EJ5 cells

to measure total NHEJ.

# Supplementary figure 3

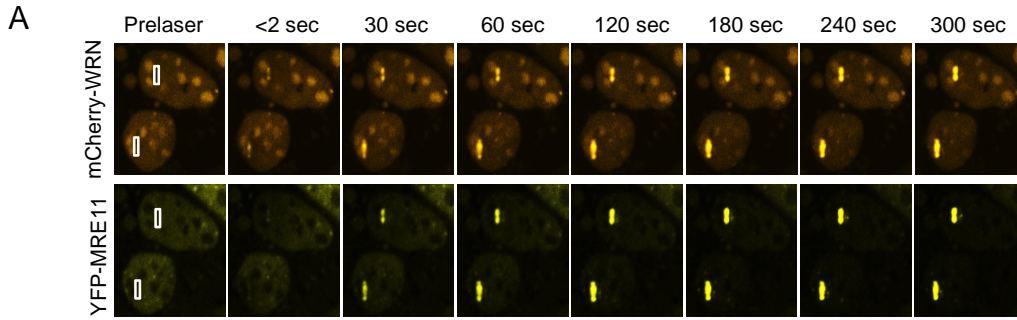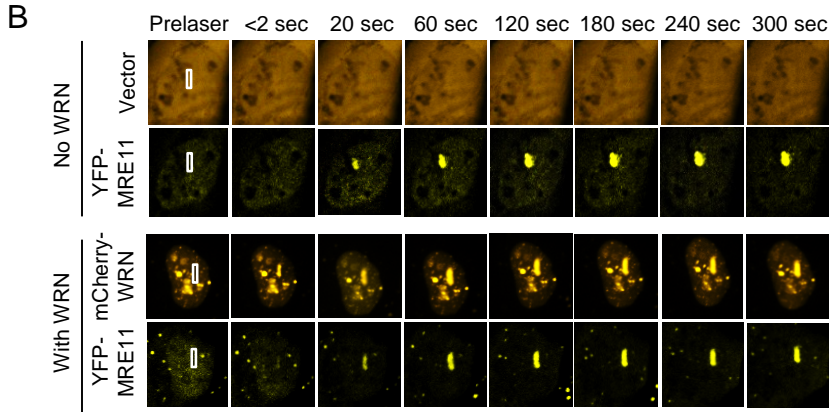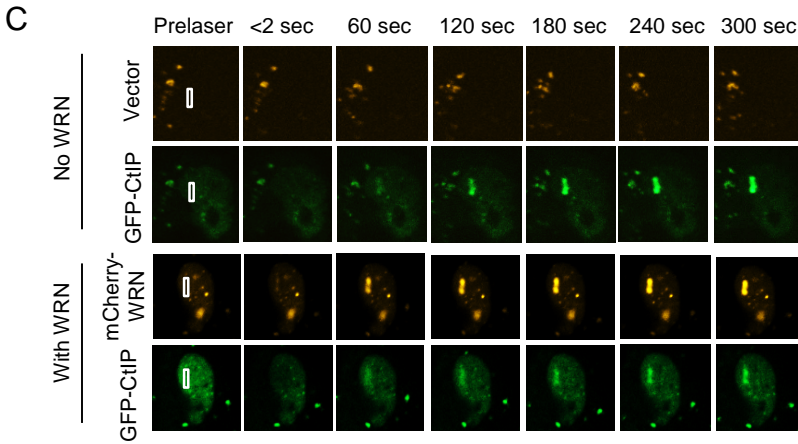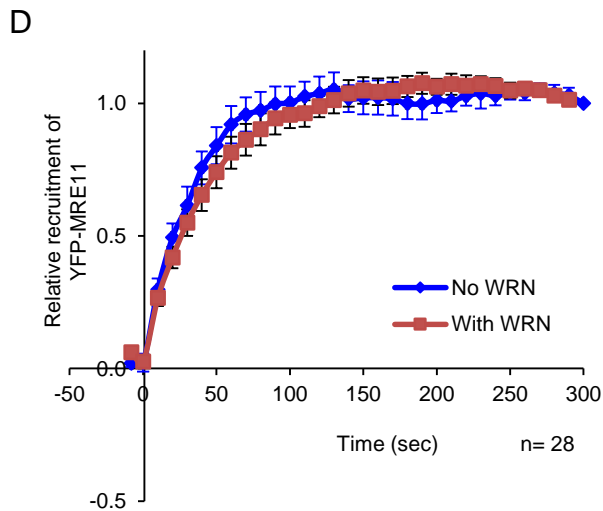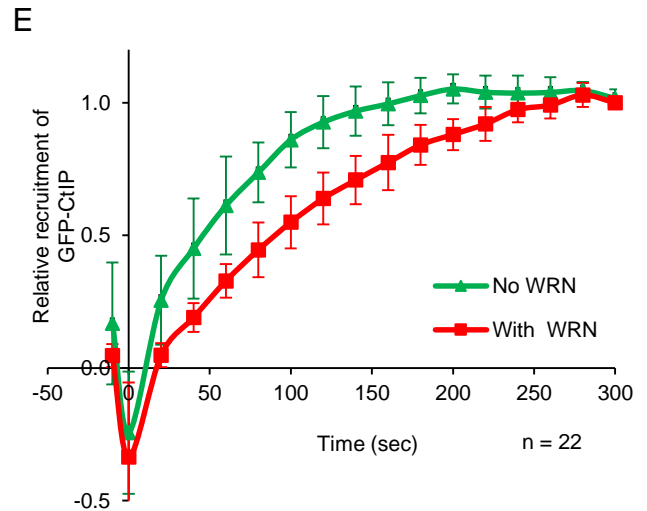

Supplementary figure 3. WRN deficiency increases recruitment of MRE11 and CtIP to DSBs. (A) Representative images showing recruitment of mCherry-WRN and YFP-MRE11 to microirradiated laser tracks in U2OS cells. (B) Micrographs showing YFP-MRE11 recruitment to laser-induced DSB tracks in AG1135 WS cells transfected with vector (No WRN) and mCherry-WRN (with WRN). (C) Micrographs showing GFP-CtIP recruitment to DSBs in WS cells, AG11395, in the absence and presence of WRN. (D) Graph showing YFP-MRE11 recruitment kinetics to DSBs in the presence and absence of WRN. (E) GFP-CtIP recruitment kinetics in AG11395 cells expressing with and without mCherry-WRN. White boxes represent microirradiation tracks.

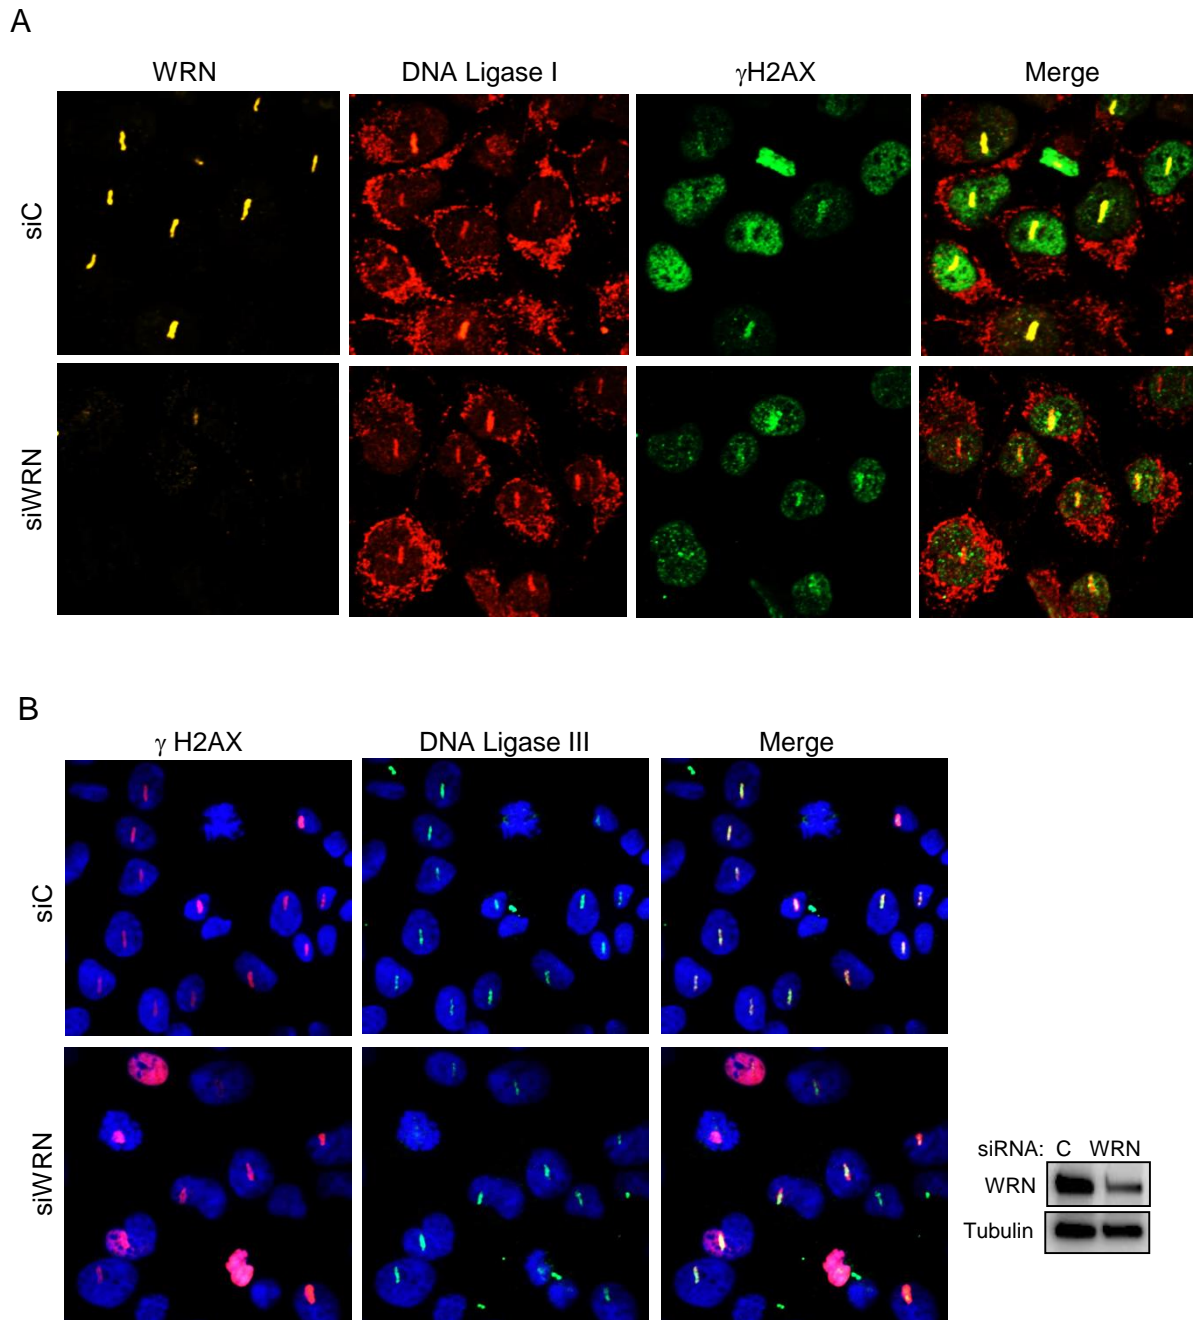

Supplementary figure 4. WRN deficiency does not affect the recruitment of DNA ligase I and ligase III to DSBs. (A) Recruitment of DNA ligase I to DSBs in control and WRN siRNA transfected U2OS cells. DSBs were induced by microirradiation and cells were stained with WRN, DNA ligase I and  $\gamma$ H2A.X antibodies. (B) Recruitment of DNA ligase III to DSBs in siRNA transfected U2OS cells. DSB and immunostaining with indicated antibodies were performed as in panel A. Immunoblots represent WRN knockdown levels. siC; control siRNA, siWRN; WRN siRNA.

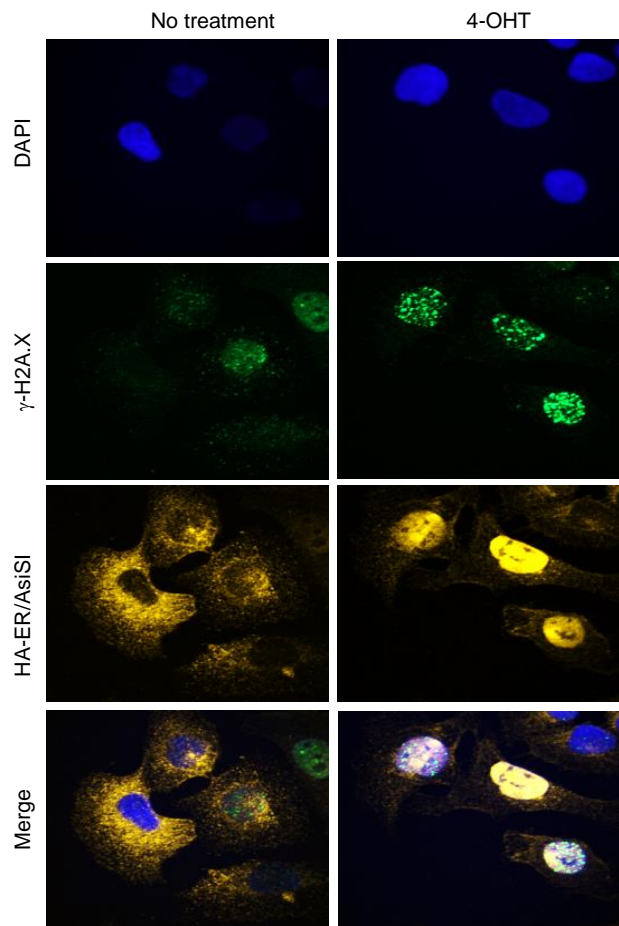

Supplementary figure 5. Induction of DSBs in AID-DIV4 cells. Cells were treated with 4-OHT (4-hydroxy tamoxifen) for 4h and immunostained with HA and  $\gamma$ H2A.X antibodies to detect HA-ER tagged AsiSI and phosphorylated (S139) H2A.X. DSBs induction is indicated by  $\gamma$ H2A.X foci.

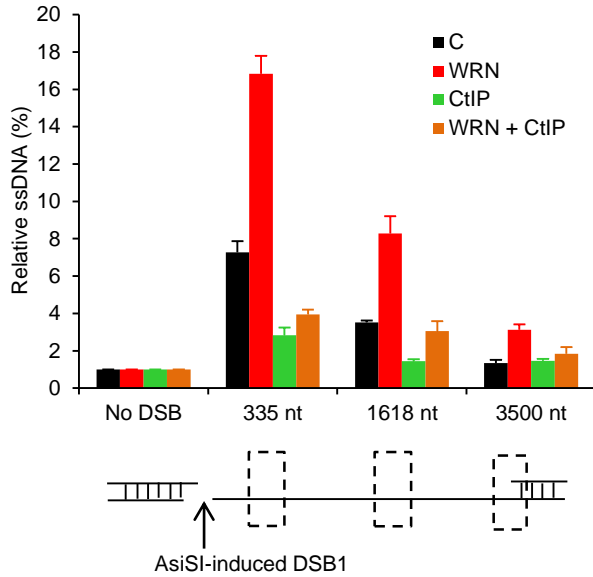

Supplementary figure 6. Quantitation of 5' end resection in AID-DivA cells transfected with control, WRN and CtIP siRNA. Graph represents data from two independent experiments. Error bars represent SEM.

Supplementary figure 7      Uncropped blots

Figure 2A

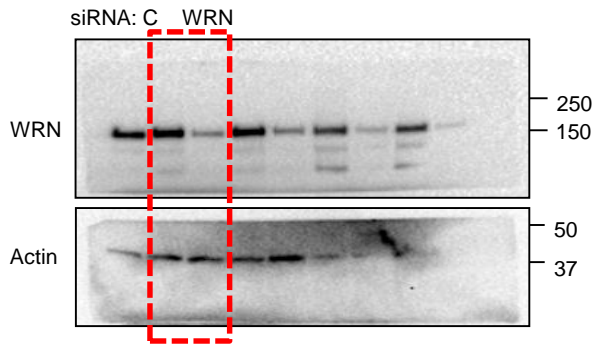

Figure 2B

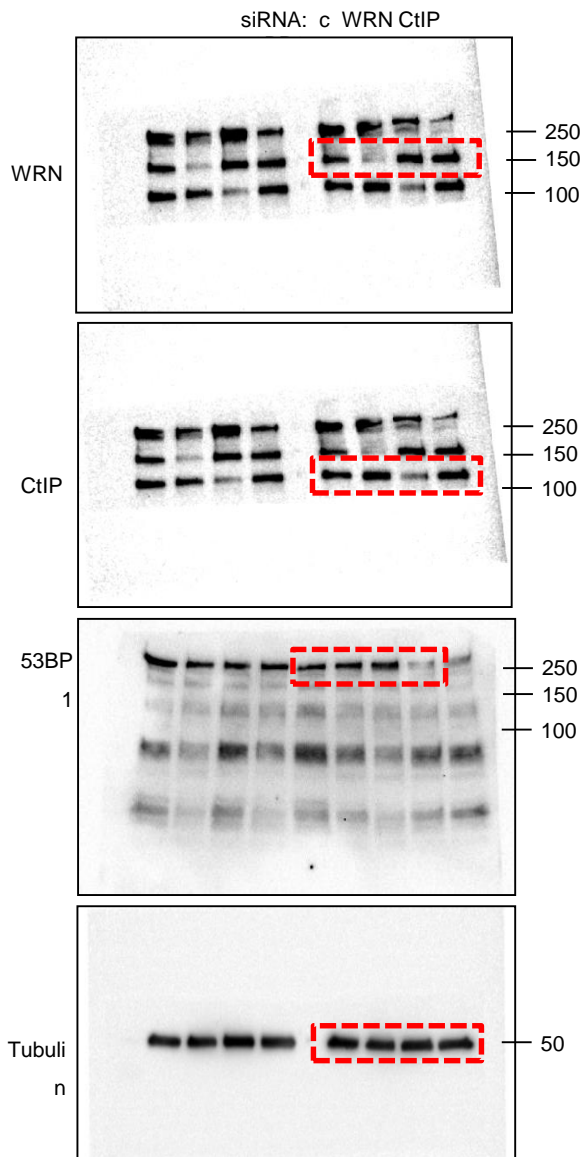

Figure 2C

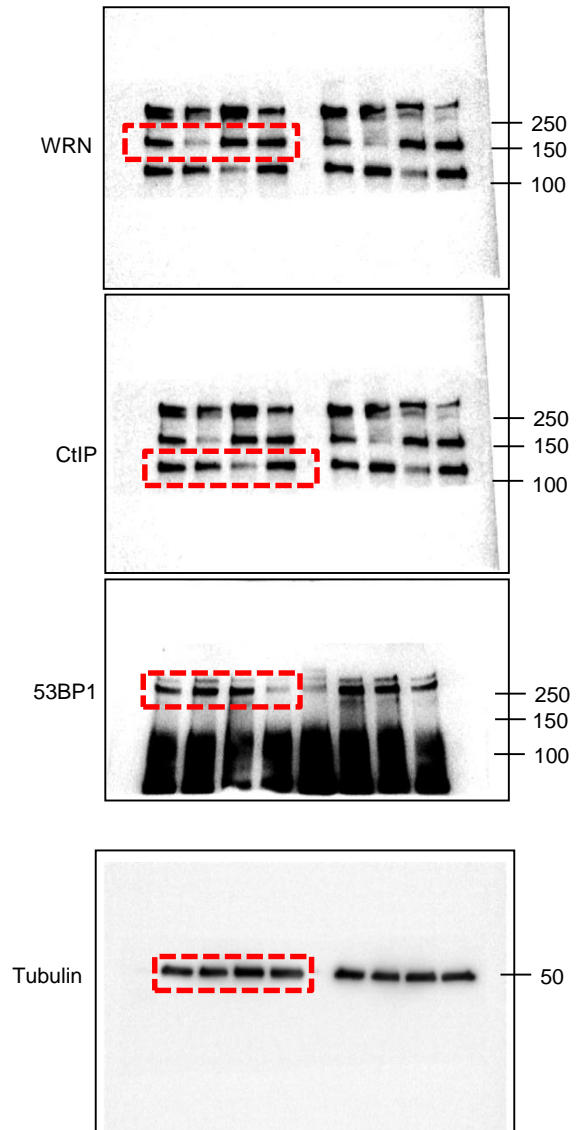



Figure 2D

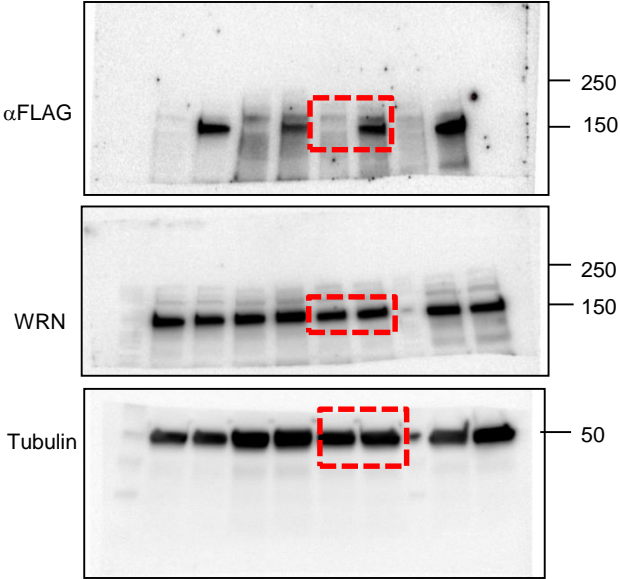

Figure 2E

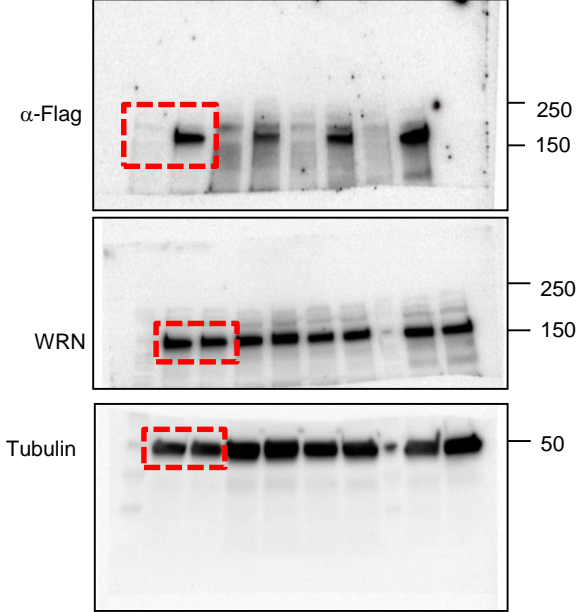

Figure 3C

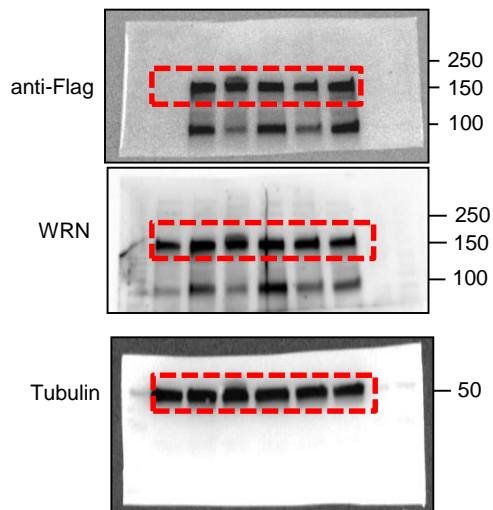

Figure 3D

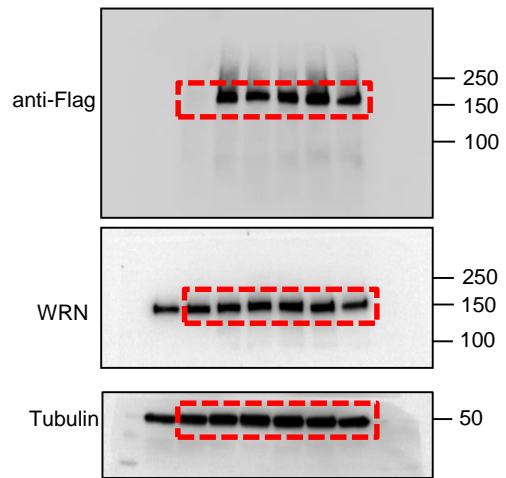

Figure 3E

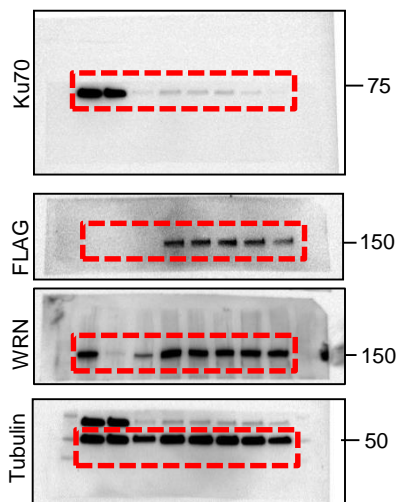

Figure 3F

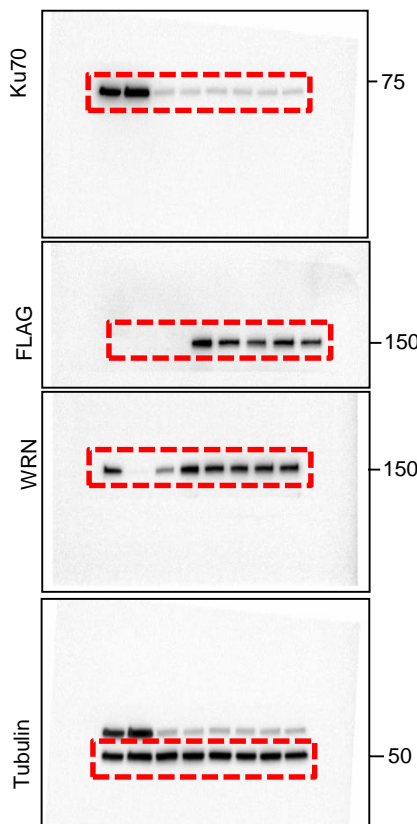

Figure 3G

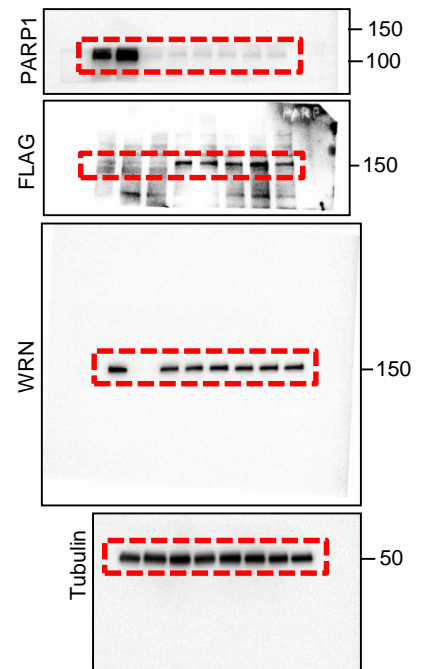

Figure 5A

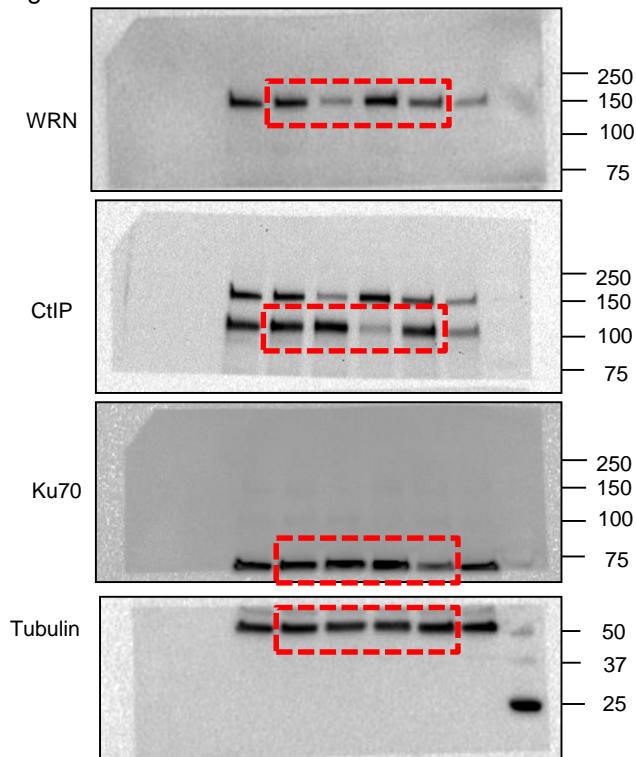

Figure 5B

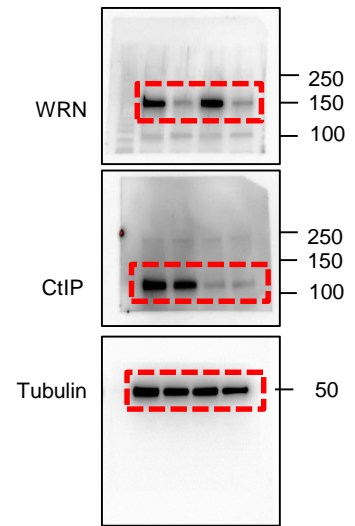

Figure 6B

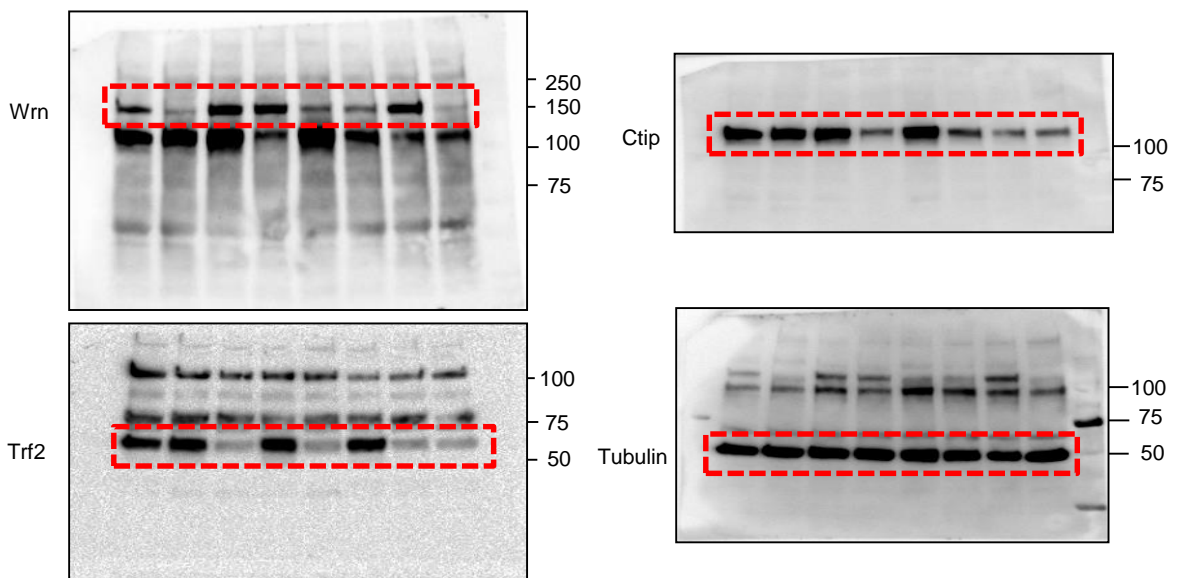

Supplementary table 1. List of antibodies used in this study

| Antibody       | Cat. Number         | Vendor                 | Dilution          | Usage             |
|----------------|---------------------|------------------------|-------------------|-------------------|
| DNA-PKcs       | G4: sc-5282         | Santa Cruz             | 1:2000            | WB                |
| DNA ligase IV  | sc-271299           | Santa cruz             | 1:1000            | WB                |
| Ku80           | C20                 | Santa Cruz             | 1:1000            | WB                |
| Ku70           | N3H3                | Santa Cruz             | 1:3000            | WB                |
| DNA ligase I   | sc-20222            | Santa Cruz             | 1: 1000<br>1: 100 | WB<br>IF          |
| actin          | sc-1616             | Santa Cruz             | 1:2000            | WB                |
| tubulin        | sc-5286             | Santa Cruz             | 1: 2000           | WB                |
| CtIP           | 14-1                | Active Motif           | 1:1000<br>1:100   | WB,<br>IF         |
| Artemis        | N3C3                | GeneTex                | 1:1000            | WB                |
| XLF            | ab33499             | Abcam                  | 1:1000            | WB                |
| DNA ligase III | 1F3                 | GeneTex                | 1: 1000<br>1:50   | WB<br>IF          |
| PARP1          | 4C10-5              | BD biosciences         | 1: 1000           | WB                |
| XRCC1          | GTX23133            | GeneTex                | 1: 1000           | WB                |
| 53BP1          | C19                 | BD biosciences         | 1: 1000           | WB                |
| RPA32          | NA-18               | EMD Millipore          | 1:25              | Flow<br>cytometry |
| MRE11          | Ab214               | Abcam                  | 1:1000<br>1:50    | WB<br>IF          |
| $\gamma$ H2AX  | JBW301<br>sc-101696 | Millipore<br>SantaCruz | 1:2000<br>1:3000  | IF<br>IF          |
| CtIP           | 14-1                | Active Motif           | 1:1000<br>1:50    | WB<br>IF          |
| WRN            | H300                | Santa Cruz             | 1:1000<br>1:50    | WB<br>IF          |
| Trf2           | NB110-57130         | Novus Biologics        | 1:1000            | WB                |
